# Supplementary material
Source: publisher figshare collection journal article supplement (https://frontiersin.figshare.com/ndownloader/files/22654685)
Supplement: Supplementary file 1 [file 22654685]

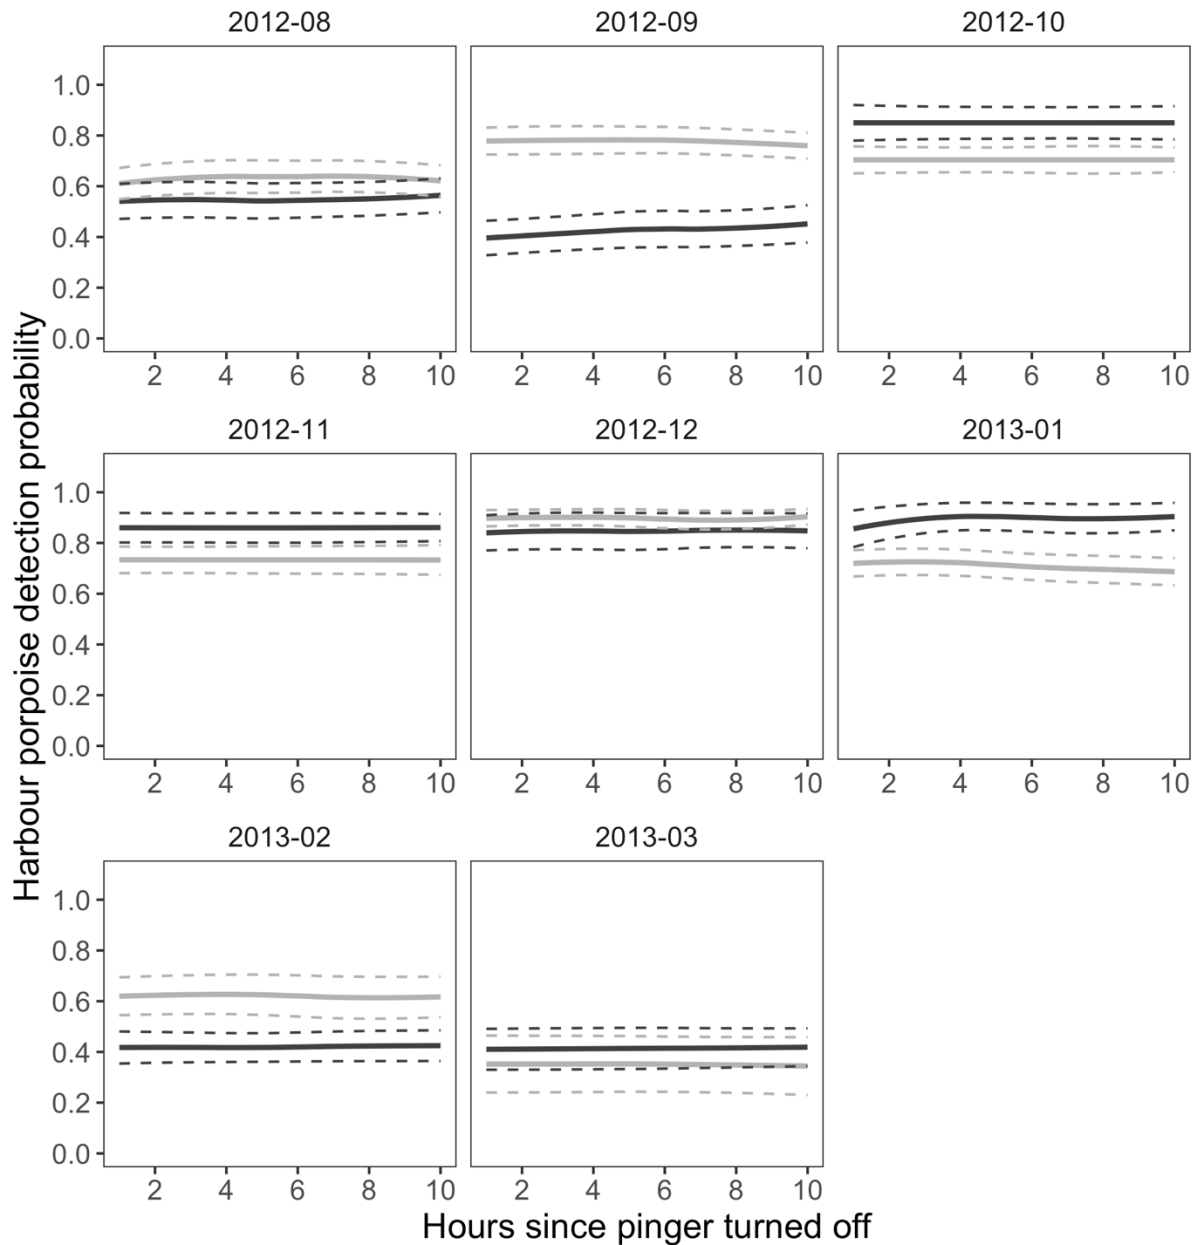

**Figure S7. Monthly displacement.** Relationship between the probability of detecting harbour porpoises and the number of hours since the pinger turned off as a function harbour porpoise presence 1 hr before the pinger turned on (absent: dark grey, present: light grey) at the C-POD near the pinger broken down for each month. Solid lines denote predictions from the least complex model presented in Table 1. Standard errors are shown by the dashed colour lines.
